# Supplementary material for: A MOF-derived CuCo(O)@ carbon–nitrogen framework as an efficient synergistic catalyst for the hydrolysis of ammonia borane
Source: Royal Society of Chemistry journal article supplement (doi:10.1039/d0qi00023j), 2020-01-01
Supplement: d0qi00023j1.pdf [file d0qi00023j1.pdf]

## MOF-derived CuCo(O)<sub>2</sub>@ carbon-nitrogen framework as an efficient synergistic catalyst for hydrolysis of ammonia borane

Yao Yuan,<sup>a</sup> Xiaoyu Chen,<sup>a</sup> Xing Zhang,<sup>a</sup> Zumin Wang<sup>\*b</sup> and Ranbo Yu<sup>\*ac</sup>

<sup>a</sup> Department of Physical Chemistry, School of Metallurgical and Ecological Engineering, University of Science and Technology Beijing, Beijing 100083, China.

<sup>b</sup> State Key Laboratory of Biochemical Engineering, Institute of Process Engineering, Chinese Academy of Sciences, 1 North 2nd Street, Zhongguancun, Haidian District, Beijing 100190, China.

<sup>c</sup> Key Laboratory of Advanced Material Processing & Mold (Ministry of Education), Zhengzhou University, Zhengzhou 450002, China.

Email: [ranboyu@ustb.edu.cn](mailto:ranboyu@ustb.edu.cn); [wangzm@ipe.ac.cn](mailto:wangzm@ipe.ac.cn)

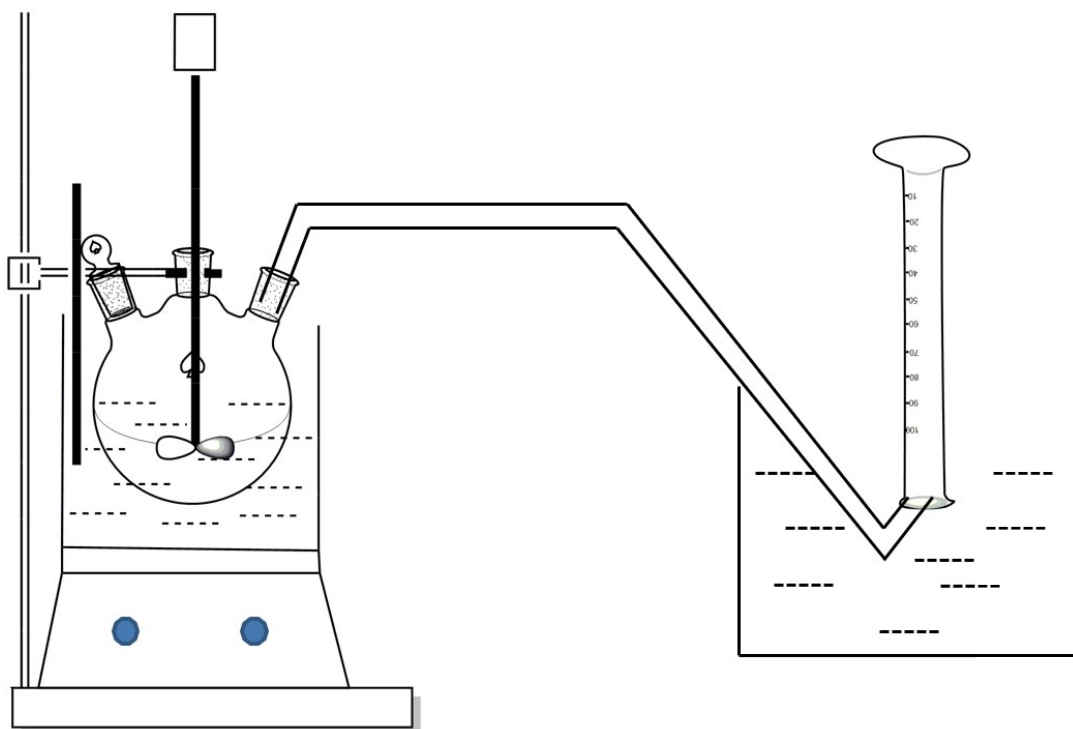

Fig S1 Catalytic test equipment diagram

**Table S1 Element contents analysis of different Samples**

| Sample         | ICP     |         |
|----------------|---------|---------|
|                | Cu(wt%) | Co(wt%) |
| Co(O)@CN       | 0       | 42.86   |
| CuCo(O)@CN-I   | 1.50    | 35.00   |
| CuCo(O)@CN-II  | 5.19    | 42.38   |
| CuCo(O)@CN-III | 5.14    | 53.06   |

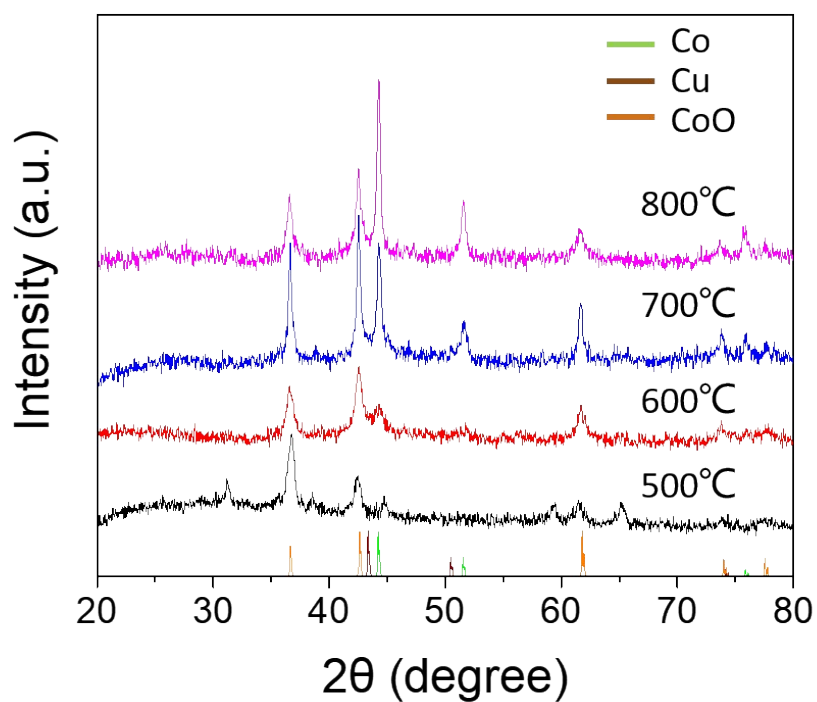

**Fig S2 XRD of samples obtained by calcination at different temperatures**

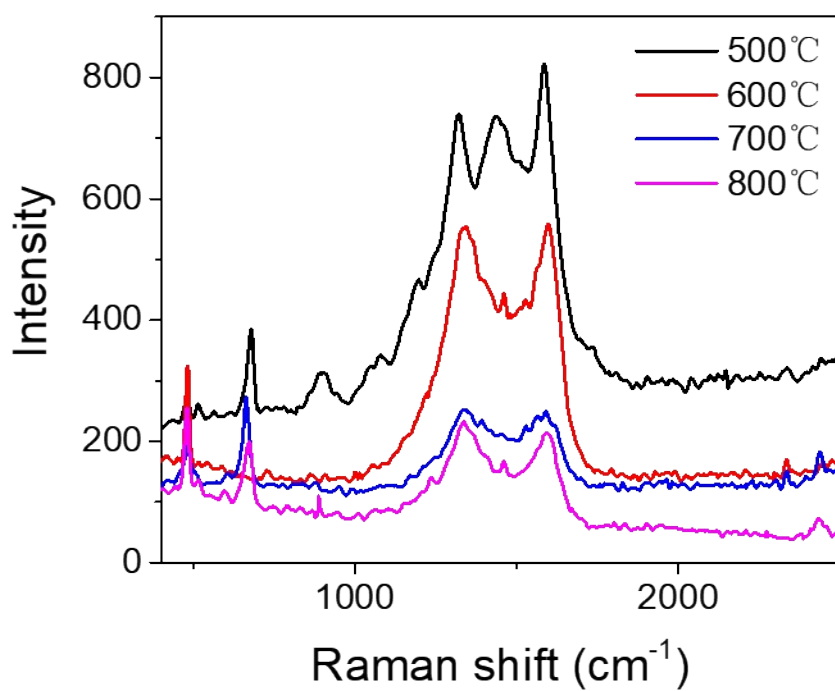

**Fig S3** Raman spectra of samples obtained by calcination at different temperatures

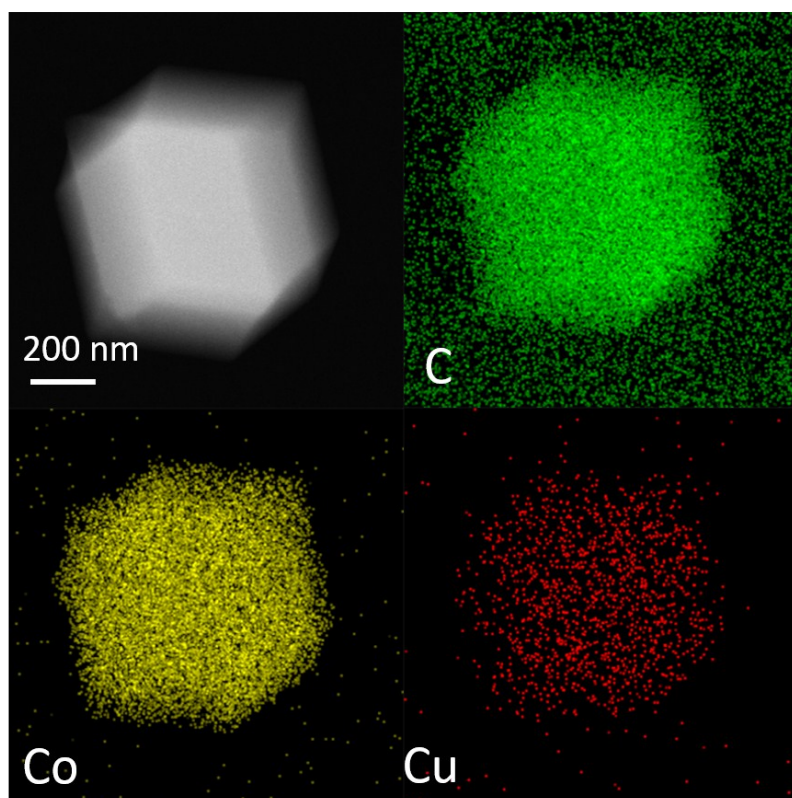

**Fig S4** STEM elemental mapping of CuCo-ZIF-III

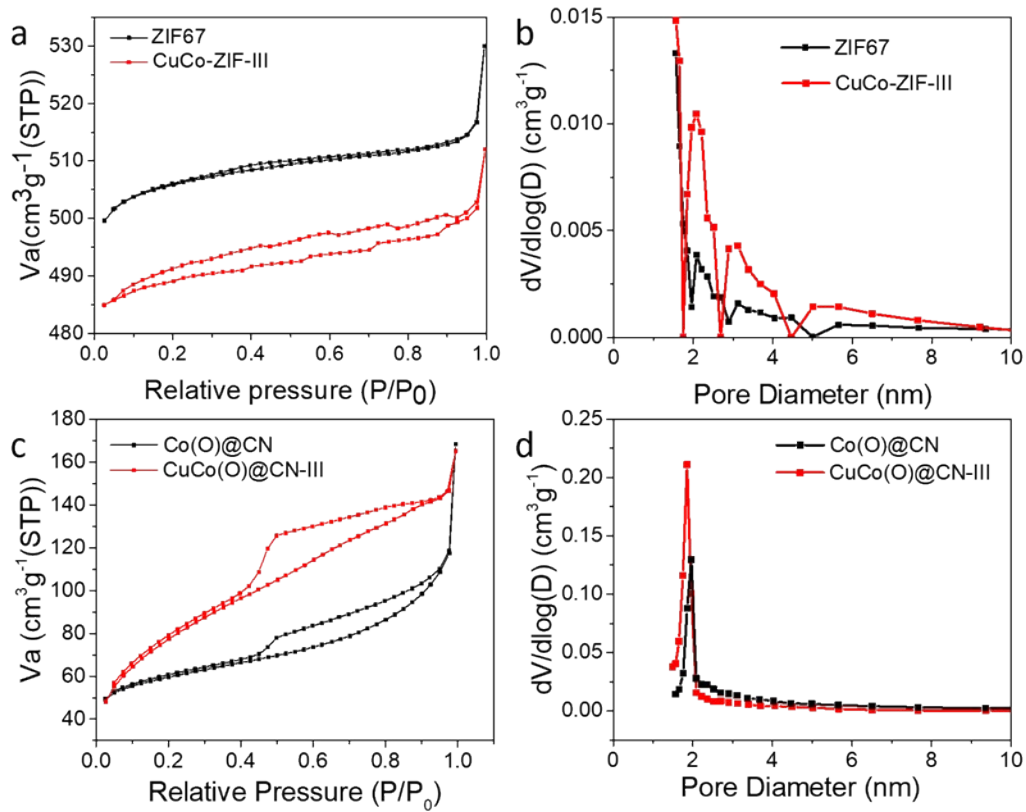

**Fig S5 (a)  $\text{N}_2$  adsorption-desorption isotherms (b) pore size distribution curves of ZIF-67 and CuCo-ZIF-III (c)  $\text{N}_2$  adsorption-desorption isotherms (d) pore size distribution curves of Co(O)@CN and CuCo(O)@CN-III**

**Table S2 Specific surface area and Pore volume of different Samples**

| Sample         | Specific surface area<br>( $\text{m}^2 \text{g}^{-1}$ ) | Pore volume ( $\text{m}^3 \text{g}^{-1}$ ) |
|----------------|---------------------------------------------------------|--------------------------------------------|
| ZIF67          | 1742                                                    | 0.8159                                     |
| CuCo-ZIF-III   | 1694                                                    | 0.7939                                     |
| Co(O)@CN       | 209.3                                                   | 0.2609                                     |
| CuCo(O)@CN-III | 380.1                                                   | 0.2498                                     |

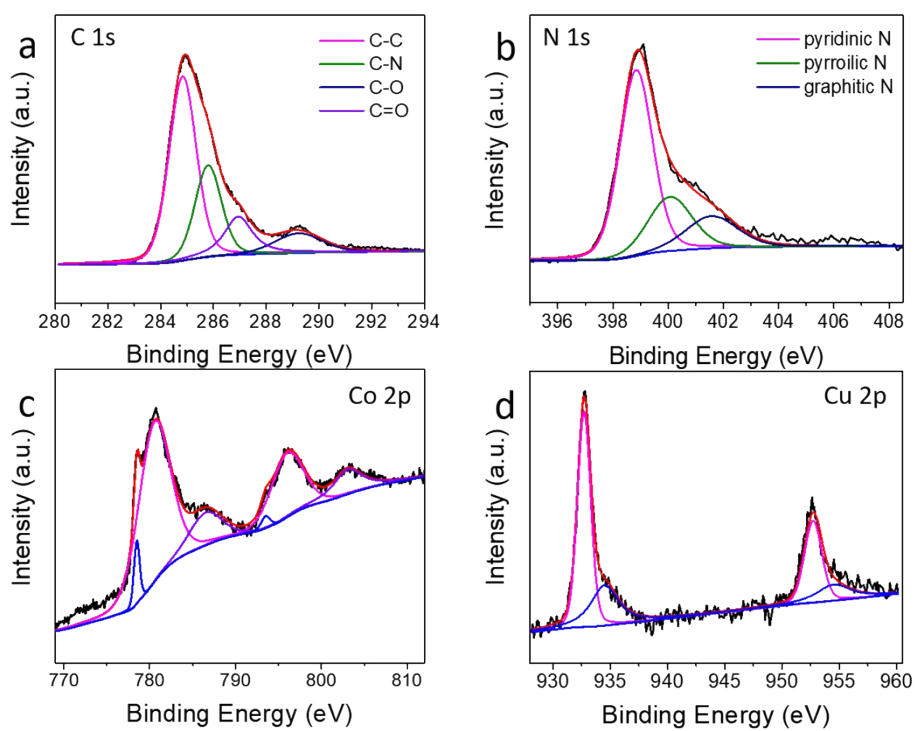

**Fig S6 The XPS pattern of CuCo (O)@CN-III after catalytic reaction: (a) C1s; (b) N1s; (c) Co2p; (d)Cu2p**

**Table S3 Catalytic activities of different catalysts used for the hydrolytic dehydrogenation of AB at room temperature**

| catalyst                                                       | H <sub>2</sub> generation Rate (mL·min <sup>-1</sup> g <sup>-1</sup> ) | TOF (mol H <sub>2</sub> ·(mol cat) <sup>-1</sup> min <sup>-1</sup> ) | Ea (kJ mol <sup>-1</sup> ) | Reference                                                    |
|----------------------------------------------------------------|------------------------------------------------------------------------|----------------------------------------------------------------------|----------------------------|--------------------------------------------------------------|
| CuCo (O)@CN-III                                                | 4524                                                                   | 12.39                                                                | 33.84                      | <b>This work</b>                                             |
| Co <sub>0.52</sub> Cu <sub>0.48</sub>                          | 2179                                                                   | 3.4                                                                  | 37.3                       | Int. J. Hydrogen Energy 42 (2017) 30691–30703.               |
| Cu <sub>0.64</sub> Ni <sub>0.36</sub> -TiO <sub>2</sub> (B)NTs | 5763.86                                                                | 15.9                                                                 | 36.14                      | Inorg. Chem. Front. 5(2018) 2038–2044.                       |
| Cu <sub>0.4</sub> Co <sub>0.6</sub> -BNNFs                     | 3387.1                                                                 | 8.42                                                                 | 21.8                       | J. Power Sources 431 (2019) 135–143                          |
| Cu <sub>0.2</sub> Co <sub>0.8</sub> /HPC                       | 2960                                                                   | —                                                                    | 47.3                       | J. Alloy. Comp. 651 (2015) 382–388.                          |
| Cu <sub>0.8</sub> Co <sub>0.2</sub> O-GO                       | —                                                                      | 70.0                                                                 | —                          | Angew. Chem. Int. Ed., 55, (2016) 11950–11954                |
| CuCo/graphene                                                  | —                                                                      | 9.18                                                                 | —                          | J. Mater. Chem. 22 (2012) 10990–10993                        |
| Cu <sub>0.5</sub> Ni <sub>0.5</sub> -CN                        | —                                                                      | —                                                                    | 39                         | J. Mater. Chem. A 1 (2013) 14790–14796.                      |
| Co/SAG                                                         | 3013                                                                   | 7.17                                                                 | 46.4                       | RSC Adv. ,5,(2015)13985-13992.                               |
| Ni NPs/C                                                       | —                                                                      | 8.8                                                                  | —                          | J. Am. Chem. Soc., 132, (2010) 1468-1469.                    |
| In-situ Fe <sub>1-x</sub> Ni <sub>x</sub> NPs                  | —                                                                      | 10.9                                                                 | —                          | J. Power Sources 194,(2009) 478-481.                         |
| Co-Co <sub>3</sub> O <sub>4</sub> /carbon dots                 | 6816                                                                   | 17.93                                                                | 40                         | J. Energy Chem., 48 (2020) 43–53.                            |
| Co-CoO <sub>x</sub> @NCS-                                      | 5562                                                                   | 13.58                                                                | 46.37                      | ACS Sustainable Chem. Eng. 7 (2019), 9782-9792.              |
| Co@N-C                                                         | —                                                                      | 5.6                                                                  | 31                         | Catal. Sci. Technol., 6, (2016) 3443–3448.                   |
| CuCo@MIL-101                                                   | —                                                                      | 19.6                                                                 | —                          | Catal. Sci. Technol., 5, (2015)525–530.                      |
| Cu-Co/PDDA-HNTs                                                | —                                                                      | 30.8                                                                 | 36.15                      | Appl. Surf. Sci., 427, (2018)106–113.                        |
| Co/hydroxyapatite                                              | 2200                                                                   | 4.54                                                                 | 50                         | Catal. Today, 183, (2012)17–25.                              |
| Cu <sub>6</sub> Fe <sub>0.8</sub> Co <sub>3.2</sub> @MIL-101   | —                                                                      | 23.2                                                                 | 37.1                       | Int. J. Hydrogen Energy (2019)10.1016/j.ijhydene.2019.06.075 |
| Co-Mo-B nanoparticles                                          | 5818                                                                   | —                                                                    | 59.3                       | Int. J. Hydrogen Energy, 44,(2019)23267-23276                |
| Co/NPCNW                                                       | 2638                                                                   | 7.29                                                                 | 25.4                       | Mater. Horiz., 4, (2017) 268–273.                            |

---

|        |   |     |      |                                     |
|--------|---|-----|------|-------------------------------------|
| Co@NMC | — | —   | 41.6 | J. Power Sources, 399, (2018)89–97. |
| Co@N-C | — | 8.4 | 36.1 | Langmuir, 35, (2019) 671–677.       |

---
